# Supplementary material
Source: PubMed Central journal article supplement (PMC3438669)
Supplement: NIHMS404477-supplement-04.pdf [file NIHMS404477-supplement-04.pdf]

### **Supplemental Figure Legends**

**Supplemental Figure 1. Flow charts of two scenarios to analyze cytokine signaling in murine HSCs based on the current phospho-flow procedure.**

**Supplemental Figure 2. CD150<sup>-</sup> CD41<sup>-</sup> cells and CD150<sup>+</sup> CD41<sup>-</sup> cells are highly purified from Sca1<sup>+</sup> enriched cells.** Percentages of CD150<sup>-</sup> CD41<sup>-</sup> cells and CD150<sup>+</sup> CD41<sup>-</sup> cells in Sca1<sup>+</sup>-enriched cells are presented as mean  $\pm$  s.d. (n=9). The sorted cells were reanalyzed using the same setting of the same sorter. A purity above 95% was routinely obtained from all the independent sorting experiments. Results of a representative experiment are shown.

**Supplemental Figure 3. SCF signaling study in LK, LK Sca1<sup>-</sup>, and LK Sca1<sup>+</sup> cells.**

Sca1<sup>-</sup> and Sca1<sup>+</sup> cells were separated using AutoMACS. The purified cells were starved and stimulated with 1 or 10 ng/ml of SCF (dose study), or 10 ng/ml of SCF for 10 or 30 minutes (time-course study) as described in Figure 5 in parallel with LK cells. Levels of phosphorylated ERK1/2 (pERK1/2) were measured and quantified as described in Figure 5. The Lin cocktail includes CD3, CD4, CD8, Ter119, B220 and Gr1.

**Supplemental Figure 4. A schematic picture illustrating the relative strengths of SCF, TPO, GM-CSF signaling in HSCs, MPPs, and LK cells.**
